# Supplementary material for: Optimized Bentonite Clay Adsorbents for Methylene Blue Removal
Source: MDPI journal article supplement (doi:10.3390/pr12040738), 2024-04-05
Supplement: s1 [file s1]

Table S1: XRD analysis illustrating the characteristics of raw BC, BABC (1–18 M), and the optimal AABC activation sample (7 M).

| Substance | Activation | Peak   | Intensity                              | Ref     |
|-----------|------------|--------|----------------------------------------|---------|
| BC        | Raw        | 29.48° | 134, SiO <sub>2</sub>                  | [50]    |
|           |            | 33.14° | 58, Na <sub>2</sub> O                  |         |
| BABC      | 1M         | 35.72° | 112, SiO <sub>2</sub>                  | [39,45] |
|           |            | 48.62° | 40, MgO                                |         |
|           | 4M         | 54.12° | 62, Al <sub>2</sub> O <sub>3</sub>     |         |
|           |            | 61.86° | 66, SiO <sub>2</sub>                   |         |
|           | 7M         | 24.38° | 38, Na <sub>2</sub> O                  |         |
|           |            | 33.42° | 32, Na <sub>2</sub> O                  |         |
|           | 10M        | 49.58° | 18, SiO <sub>2</sub>                   |         |
|           |            | 54.2°  | 24, Al <sub>2</sub> O <sub>3</sub>     |         |
|           | 13M        | 62.24° | 36, Al <sub>2</sub> O <sub>3</sub>     |         |
|           |            | 24.5°  | 42, Na <sub>2</sub> O                  |         |
|           | 16M        | 25.48° | 48, Na <sub>2</sub> O                  |         |
|           |            | 28.06° | 48, Al <sub>2</sub> O <sub>3</sub>     |         |
|           |            | 33.24° | 62, Na <sub>2</sub> O                  |         |
|           |            | 35.64° | 66, SiO <sub>2</sub>                   |         |
|           |            | 43.18° | 44, SiO <sub>2</sub>                   |         |
|           |            | 49.48° | 24, SiO <sub>2</sub>                   |         |
|           |            | 24.3°  | 82, Na <sub>2</sub> O                  |         |
|           |            | 26.46° | 44, Na <sub>2</sub> O                  |         |
|           |            | 29.78° | 106, SiO <sub>2</sub>                  |         |
|           |            | 31.56° | 42, SiO <sub>2</sub>                   |         |
|           |            | 33.14° | 50, Na <sub>2</sub> O                  |         |
|           |            | 34.84° | 70, Al <sub>2</sub> O <sub>3</sub>     |         |
|           |            | 35.68° | 62, SiO <sub>2</sub>                   |         |
|           |            | 42.68° | 40, Al <sub>2</sub> O <sub>3</sub>     |         |
|           |            | 49.52° | 24, Al <sub>2</sub> O <sub>3</sub>     |         |
|           |            | 53.98° | 32, Al <sub>2</sub> O <sub>3</sub>     |         |
|           |            | 51.88° | 28, MgO                                |         |
|           |            | 61.72° | 34, SiO <sub>2</sub>                   |         |
|           |            | 64.02° | 26, SiO <sub>2</sub>                   |         |
|           |            | 24.5°  | 119, Na <sub>2</sub> O                 |         |
|           |            | 31.94° | 54, SiO <sub>2</sub>                   |         |
|           |            | 33.4°  | 38, Na <sub>2</sub> O                  |         |
|           |            | 34.84° | 66, Al <sub>2</sub> O <sub>3</sub>     |         |
|           |            | 35.84° | 56, SiO <sub>2</sub>                   |         |
|           |            | 43°    | 48, SiO <sub>2</sub>                   |         |
|           |            | 52.1°  | 38, MgO                                |         |
|           |            | 54.14° | 26, Al <sub>2</sub> O <sub>3</sub>     |         |
|           |            | 58.46° | 32, Al <sub>2</sub> O <sub>3</sub>     |         |
|           |            | 64.32° | 28, SiO <sub>2</sub>                   |         |
|           |            | 24.42° | 166, Na <sub>2</sub> O                 |         |
|           |            | 24.54° | 70, Na <sub>2</sub> O                  |         |
|           |            | 28.28° | 36, Al <sub>2</sub> O <sub>3</sub>     |         |
|           |            | 34.72° | 94, Al <sub>2</sub> O <sub>3</sub>     |         |
|           |            | 42.82° | 60, Al <sub>2</sub> O <sub>3</sub>     |         |
|           |            | 58.34° | 32, Al <sub>2</sub> O <sub>3</sub>     |         |
|           |            | 31.7°  | 62, SiO <sub>2</sub>                   |         |
|           |            | 35.66° | 54, SiO <sub>2</sub>                   |         |
|           |            | 36.8°  | 32, SiO <sub>2</sub>                   |         |
|           |            | 62.26° | 24, Al <sub>2</sub> O <sub>3</sub>     |         |
|           |            | 64.1°  | 52, SiO <sub>2</sub>                   |         |
|           |            | 52.18° | 30, MgO                                |         |
|           |            | 54.14° | 26, MgO                                |         |
|           |            | 24.44° | 170, Na <sub>2</sub> O (⊗)             |         |
|           |            | 25.52  | 38, Na <sub>2</sub> O (⊗)              |         |
|           |            | 26.56° | 80, Na <sub>2</sub> O (⊗)              |         |
|           |            | 28.3°  | 36, Al <sub>2</sub> O <sub>3</sub> (√) |         |
|           |            | 29.48° | 58, SiO <sub>2</sub> (△)               |         |
|           |            | 31.64° | 56, SiO <sub>2</sub> (△)               |         |

|      |     |                                                                                                                         |                                                                                                                                                                                                                                                                                                                                                                                                                                                                                |      |
|------|-----|-------------------------------------------------------------------------------------------------------------------------|--------------------------------------------------------------------------------------------------------------------------------------------------------------------------------------------------------------------------------------------------------------------------------------------------------------------------------------------------------------------------------------------------------------------------------------------------------------------------------|------|
|      |     | 33.24°<br>34.7<br>35.62°<br>37.7°<br>41.04<br>42.8<br>49.48<br>51.98°<br>52<br>54.2°<br>58.36<br>62.3<br>63.98<br>69.42 | 62, Na <sub>2</sub> O (⊗)<br>92, Al <sub>2</sub> O <sub>3</sub> (▽)<br>58, SiO <sub>2</sub> (△)<br>32, Al <sub>2</sub> O <sub>3</sub> (▽)<br>24, Al <sub>2</sub> O <sub>3</sub> (▽)<br>60, Al <sub>2</sub> O <sub>3</sub> (▽)<br>26, Al <sub>2</sub> O <sub>3</sub> (▽)<br>28, MgO (□)<br>24, MgO (□)<br>28, MgO (□)<br>38, Al <sub>2</sub> O <sub>3</sub> (▽)<br>28, Al <sub>2</sub> O <sub>3</sub> (▽)<br>34, Al <sub>2</sub> O <sub>3</sub> (▽)<br>28, SiO <sub>2</sub> (△) |      |
|      | 18M | 24.48°<br>26.82°<br>31.84°<br>33.28°<br>34.72°<br>35.76°<br>42.94°<br>54.16°<br>58.32°<br>62.02°<br>64.1°<br>69.4°      | 158, Na <sub>2</sub> O<br>76, Na <sub>2</sub> O<br>50, SiO <sub>2</sub><br>58, Na <sub>2</sub> O<br>78, Al <sub>2</sub> O <sub>3</sub><br>64, SiO <sub>2</sub><br>58, Al <sub>2</sub> O <sub>3</sub><br>22, MgO<br>34, Al <sub>2</sub> O <sub>3</sub><br>26, Al <sub>2</sub> O <sub>3</sub><br>24, SiO <sub>2</sub><br>28, Al <sub>2</sub> O <sub>3</sub>                                                                                                                      |      |
| AABC | 7M  | 23°<br>27.1°                                                                                                            | 122, SiO <sub>2</sub><br>100, Al <sub>2</sub> O <sub>3</sub>                                                                                                                                                                                                                                                                                                                                                                                                                   | [46] |
